# Supplementary material for: Amphipathic engineering of magnetic composites reinforced with ion-copolymer-activated protein-bioconjugate functionalized surface
Source: Royal Society of Chemistry journal article supplement (doi:10.1039/d1qm01354h), 2021-12-21
Supplement: d1qm01354h1.pdf [file d1qm01354h1.pdf]

# **Amphipathic Engineering of Magnetic Composites Reinforced with Ion-Copolymers-Activated Protein-Bioconjugate Functionalized Surface**

*Zhi-Yong Guo<sup>a,e\*#</sup>, Guo-Bin Huang<sup>b#</sup>, Chen Zhang<sup>a</sup>, Qiu-hong Yao<sup>a</sup>, Ting-Xiu Ye<sup>d</sup>,  
Li Zhang<sup>a</sup> and Xi Chen<sup>c\*</sup>*

*<sup>a</sup>Institute of Analytical Technology and Smart Instruments and Colleague of Environment and  
Public Health, Xiamen Huaxia University, Xiamen, 361024, China*

*<sup>b</sup>Institute of Food Safety and Environment Monitoring, Fuzhou University, Fuzhou, 350108, China.*

*<sup>c</sup>State Key Laboratory of Marine Environmental Science, Xiamen University, Xiamen 361005,  
China*

*<sup>d</sup>College of pharmacy, Xiamen Medicine College, Xiamen 361005, China*

*<sup>e</sup>Xiamen Environmental Monitoring Engineering Technology Research Center*

**Keywords:** ion-copolymers; amphipathic surface; magnetic composites; glycoprotein  
separation

**\*Corresponding author.**

Corresponding author. Tel: 86 592 2184530;

E-mail address: [xichen@xmu.edu.cn](mailto:xichen@xmu.edu.cn), [guozy@hxxxy.edu.cn](mailto:guozy@hxxxy.edu.cn)

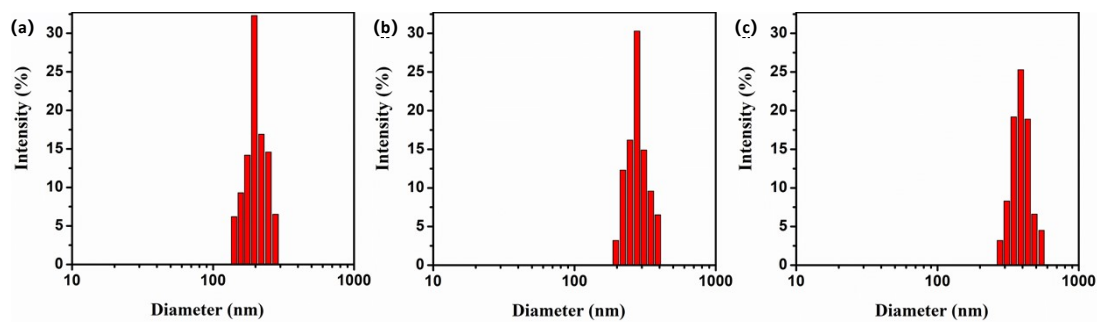

**Figure S1 Size distribution histogram of (a) Fe<sub>3</sub>O<sub>4</sub> NPs, (b) Fe<sub>3</sub>O<sub>4</sub>@PCL, and (c) Fe<sub>3</sub>O<sub>4</sub>@PCL-ZDES NPs, respectively.**

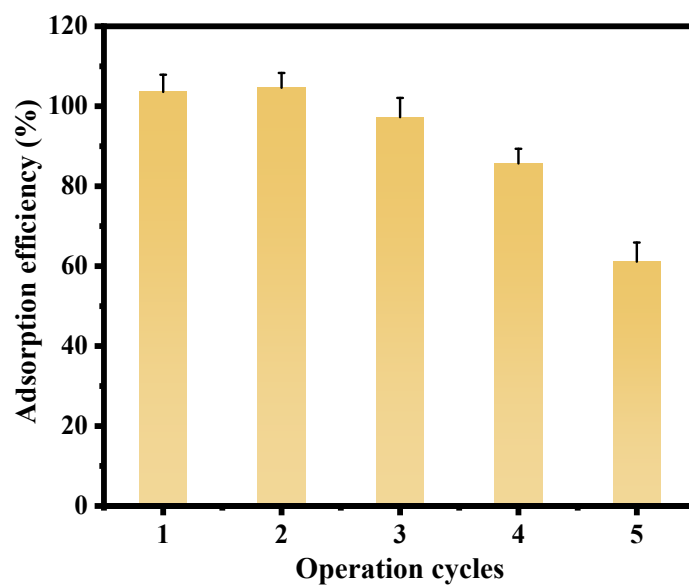

**Figure S2** The reusability of  $\text{Fe}_3\text{O}_4@\text{PCL-ZDES}$  NPs for the circulation of adsorption and desorption of Ig-G. (Protein solution: 1.0 mL,  $50 \mu\text{g mL}^{-1}$ , pH 7; adsorption time, 30 min; magnetic NPs, 1.0 mg.)

Table S1 Comparison of Adsorption Capacities for  
 Immunoglobulin G with Various Adsorbents with the Fe<sub>3</sub>O<sub>4</sub>@PCL-ZDES NPs.

| Adsorbents                                   | Adsorption capacity<br>(mg/g) | Reference |
|----------------------------------------------|-------------------------------|-----------|
| Octapeptide affinity resins                  | 176.4                         | [48]      |
| PHEMA/PGMA-IDA-Cu <sup>2+</sup>              | 257.0                         | [49]      |
| His-MWNTs                                    | 267.0                         | [50]      |
| Boronic acid GMA-MAA-DVB                     | 85                            | [51]      |
| Fe <sub>3</sub> O <sub>4</sub> @PCL-ZDES NPs | 233.2                         | this work |
